# Supplementary material for: A chromium cobaltite based ternary composite as an efficient electrode material for hybrid supercapacitors with theoretical investigation
Source: Royal Society of Chemistry journal article supplement (doi:10.1039/d4nr02982h), 2024-01-01
Supplement: d4nr02982h1.pdf [file d4nr02982h1.pdf]

# **Chromium Cobaltite Based Ternary Composite as Efficient Electrode Material for Hybrid Supercapacitors with Theoretical Investigation**

**Simran Kour, Pawanpreet Kour, A. L. Sharma\***

Department of Physics, Central University of Punjab, Bathinda, Punjab, India-151401

\*Corresponding author: [alsharma@cup.edu.in](mailto:alsharma@cup.edu.in)

## ***Supporting Information (SI)***

### **1. Electrode preparation method**

The electrodes were prepared by blending the synthesized active material, PVDF (binder), and carbon black (conductive element) in a ratio of 8:1:1 to get consistent slurry with the addition of N-Methyl-2-pyrrolidone (NMP). Nickel foam with area of 1 cm<sup>2</sup> was then coated with this slurry and dried at 60 °C overnight. The separator (Whatman paper) wetted by 6M KOH electrolyte was sandwiched between the two electrodes (cathode and anode) and pressed using a hydraulic press to get the desired cell configuration.

### **2. Electrochemical measurements**

The capacitive response of the electrode material corresponding to a voltage window of -1 to +1V was evaluated from CV and GCD in 2-E configuration. The EIS analysis was carried out for 10<sup>5</sup>-0.1 Hz of frequency at open-circuit potential. For asymmetric supercapacitor, the voltage range was 0-1.6 V. The Formulae used for determining various parameters such as specific capacitance, energy density, and power density has been provided in **Table S1**.

**Table S1:** Formulae used for finding various parameters.

| Parameter                                                         | Formula                                                                    | Terms used                                                                                                                                     |
|-------------------------------------------------------------------|----------------------------------------------------------------------------|------------------------------------------------------------------------------------------------------------------------------------------------|
| Bragg's law                                                       | $2d \sin \theta = n\lambda$                                                | ' $2\theta$ ' is bragg's diffraction angle, ' $d$ ' is inter-planar spacing, ' $\lambda$ ' is the wavelength of X-ray, ' $n$ ' is an integer,. |
| Interplanar spacing                                               | $d = \frac{1}{\sqrt{\frac{h^2}{a^2} + \frac{k^2}{b^2} + \frac{l^2}{c^2}}}$ | ( $a, b, c$ ) are lattice parameters of the crystal, ( $hkl$ ) are miller indices of lattice plane.                                            |
| Crystallite size, $D$<br>(Schherrer equation)                     | $D = \frac{K\lambda}{\omega \times \cos \theta}$                           | ' $\omega$ ' is the FWHM, ' $2\theta$ ' is bragg's diffraction angle, $K$ is a constant, ' $\lambda$ ' is the wavelength of X-ray.             |
| Specific capacitance, $C_{sp}$ for<br>single electrode (from CV)  | $C_{sp} = \frac{\int IdV}{m \times v \times dV}$                           | ' $I$ ' is the current, ' $m$ ' is the mass of active material, ' $dV$ ' is the potential window, ' $v$ ' is the scan rate.                    |
| Specific capacitance, $C_{sp}$ for<br>single electrode (from GCD) | $C_{sp} = \frac{2 \times I \times \Delta t}{m \times dV}$                  | ' $dt$ ' is the discharging time, ' $I$ ' is the current, ' $m$ ' is the mass of active material.                                              |
| Specific capacitance, $C_{sp}$ for<br>SSC/ASC (from GCD)          | $C_{sp} = \frac{I \times \Delta t}{m \times dV}$                           | ' $dt$ ' is the discharging time, ' $I$ ' is the current, ' $m$ ' is the mass of active material.                                              |
| Energy density, $E_d$                                             | $E_d = \frac{C_{sp} \times (dV)^2}{7.2}$                                   | ' $dV$ ' is the voltage window, ' $C_{sp}$ ' is the                                                                                            |

|                              |                                         |                                                                               |
|------------------------------|-----------------------------------------|-------------------------------------------------------------------------------|
| (from GCD)                   |                                         | specific capacitance.                                                         |
| Power density, $P_d$         | $P_d = \frac{E_d \times 3.6}{\Delta t}$ | $\Delta t$ is the discharging time, ' $E_d$ ' is the energy density.          |
| (from GCD)                   |                                         |                                                                               |
| Coulombic efficiency, $\eta$ | $\eta = \frac{t_d \times 100}{t_c}$     | ' $t_c$ ' is the charging time and ' $t_d$ ' is the discharging time.         |
| Response time, $\tau$        | $\tau = \frac{1}{\nu}$                  | ' $\nu$ ' is the frequency corresponding to phase angle $\theta = 45^\circ$ . |
| (from EIS)                   |                                         |                                                                               |

### 3. Results and Discussion

**Table S2:** Physico-chemical properties of activated carbon (AC).

| Property         | Value                      |
|------------------|----------------------------|
| Source           | Coconut-shell              |
| Appearance       | Black powder               |
| Molecular weight | 12.01 g mol <sup>-1</sup>  |
| Median size      | 30-60 $\mu\text{m}$        |
| Ignition temp.   | 842 $^\circ\text{F}$       |
| Melting point    | 3550 $^\circ\text{C}$      |
| Resistivity      | 1375 $\mu\Omega\text{-cm}$ |

**Table S3:** XRD analysis for CrCo<sub>2</sub>O<sub>4</sub> (CCO) microspheres.

| Angle              | Lattice plane | Interplanar                    | Crystallite |
|--------------------|---------------|--------------------------------|-------------|
| $2\theta$ (degree) | (hkl)         | spacing,<br>d ( $\text{\AA}$ ) | size (nm)   |
| 18.86              | (111)         | 4.69                           | 8.71        |
| 31.01              | (220)         | 2.88                           | 15.06       |

|       |       |      |       |
|-------|-------|------|-------|
| 36.42 | (311) | 2.46 | 10.49 |
| 44.37 | (400) | 2.03 | 11.57 |
| 54.88 | (422) | 1.67 | 8.71  |
| 58.61 | (511) | 1.57 | 9.66  |
| 64.46 | (440) | 1.44 | 10.44 |

**Table S4:** Identification of different functional groups from FTIR.

| Wavenumber (cm <sup>-1</sup> ) | Functional group               | Reference |
|--------------------------------|--------------------------------|-----------|
| 491.01                         | Cr-O                           | 1-3       |
| 628.93                         | Co-O                           | 4         |
| 745.44                         | C-H bending                    | 5         |
| 1005.87                        | =C-N<br>deformation (in-plane) | 6         |
| 1143.70                        | C-N stretching                 | 6         |
| 1156.65                        | C-O stretching                 | 6         |
| 1273.92                        | C-H in-plane bending           | 6, 7      |
| 1424.69                        | C-H bending                    | 6         |
| 1527.50                        | N-H bending                    | 6         |
| 1575.47                        | C=C stretching                 | 8         |
| 1624.21                        | C=C stretching                 | 7, 8      |
| 2103.95                        | C $\equiv$ C                   | 6         |
| 2358.28                        | CO <sub>2</sub>                | 7         |

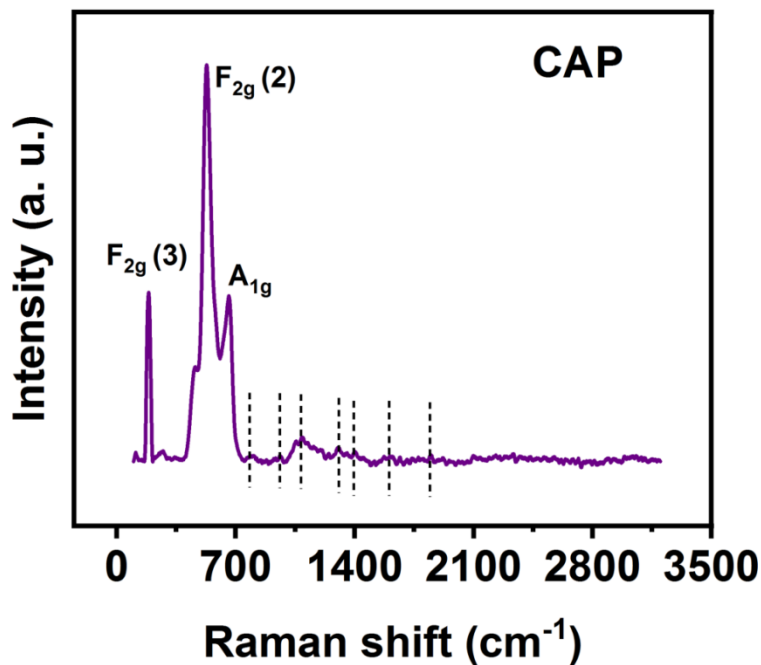

Fig. S1: Raman spectrum of CAP.

Table S5: Raman shift in CAP.

| Symmetry                | Bond vibration      | Raman shift<br>(cm <sup>-1</sup> ) | References |
|-------------------------|---------------------|------------------------------------|------------|
| $\delta(\text{O-Co-O})$ | F <sub>2g</sub> (3) | 192.88                             | 9          |
| $\nu(\text{Cr-O})$      | F <sub>2g</sub> (2) | 527.18                             | 10         |
| $\nu_s(\text{Cr-O})$    | A <sub>1g</sub>     | 663.13                             | 9, 10      |
| PPY ring                | Polaron distortion  | 965.80                             | 11         |
| C-H                     | In plane bending    | 1053                               | 12, 13     |
| C-H                     | In plane bending    | 1093                               | 4          |

---

|          |                       |      |    |
|----------|-----------------------|------|----|
| C-N      | Stretching            | 1220 | 14 |
| PPY Ring | Stretching            | 1347 | 5  |
| C=C      | Asymmetric stretching | 1418 | 14 |
| C=C      | Asymmetric stretching | 1580 | 15 |

---

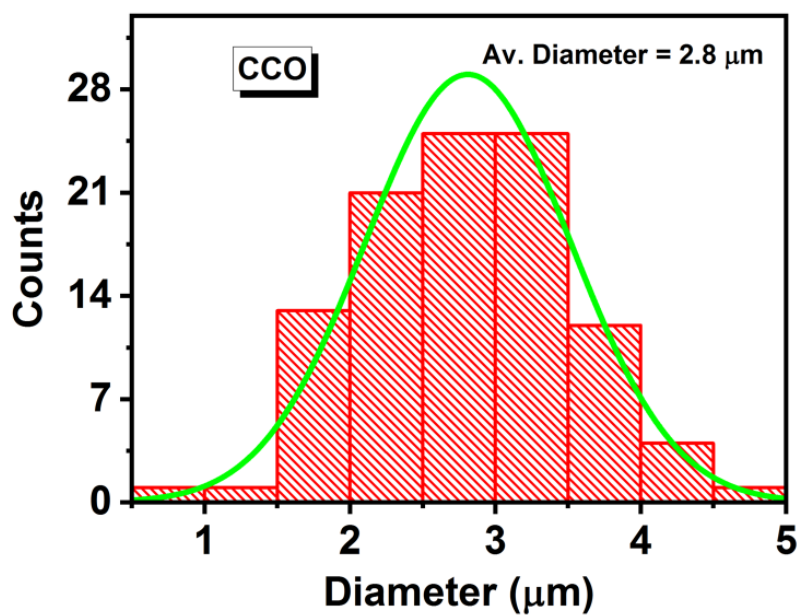

Fig. S2: Size distribution of CCO.

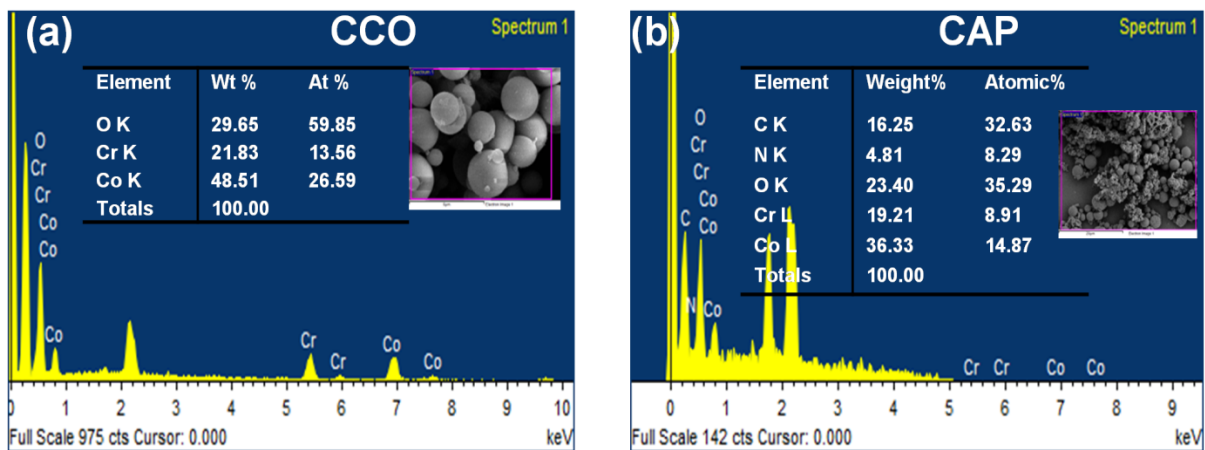

**Fig. S3:** EDS of (a) CCO and (b) CAP.

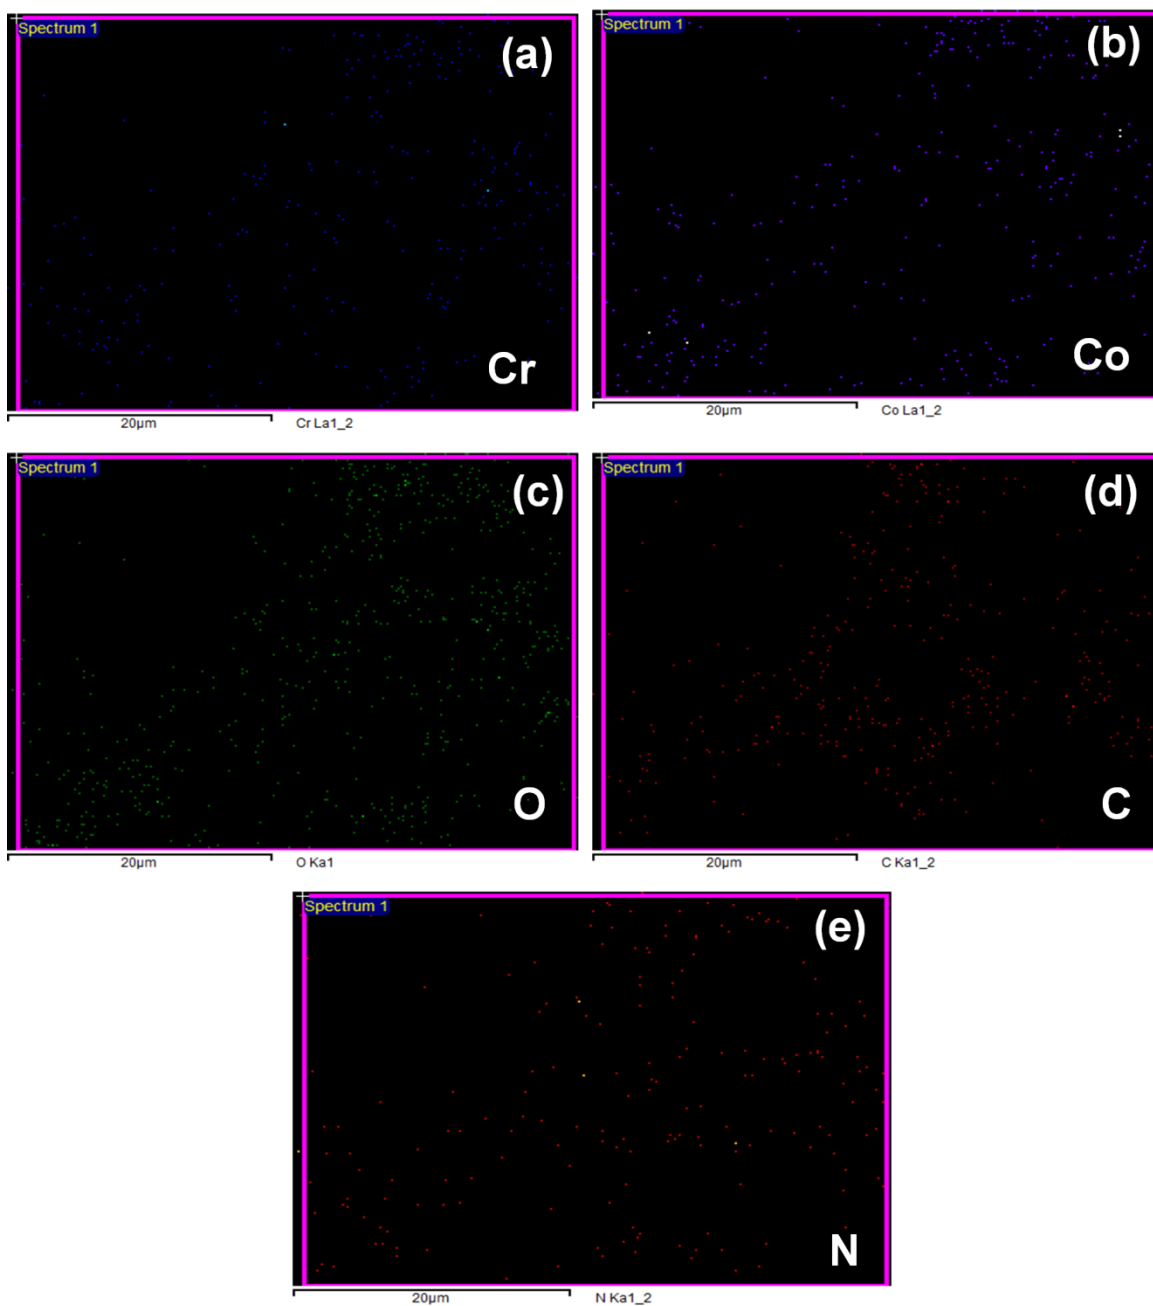

**Fig. S4:** Elemental mapping of CAP.



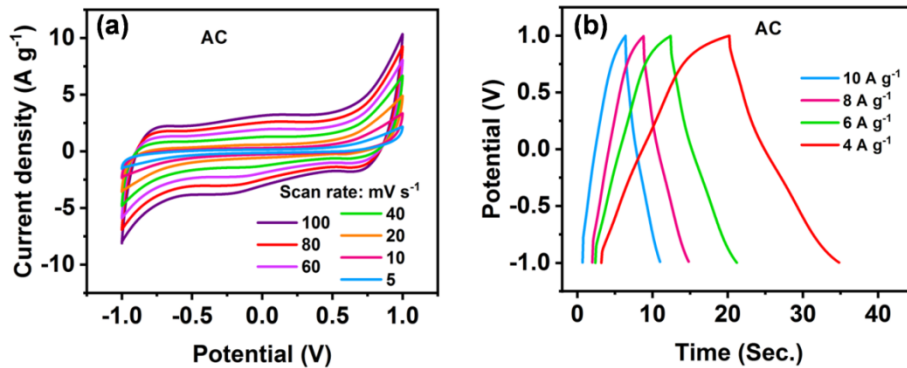

Fig. S5: (a) CV and (b) GCD curves of AC.

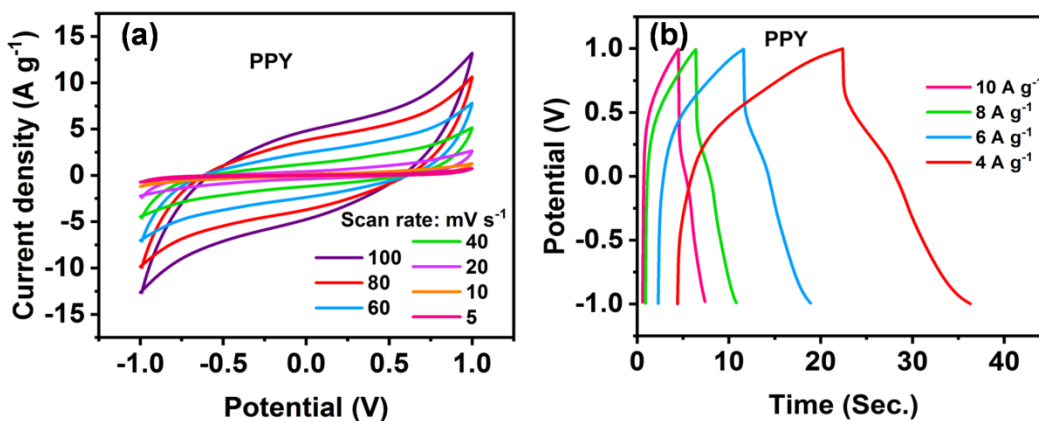

Fig. S6: (a) CV and (b) GCD curves of PPY.

Table S6:  $R_s$  and  $R_{ct}$  of CCO, CAC, and CAP.

| Sample                | CCO  | CAC  | CAP  |
|-----------------------|------|------|------|
| $R_s$ ( $\Omega$ )    | 3.69 | 2.67 | 2.14 |
| $R_{ct}$ ( $\Omega$ ) | 0.37 | 0.34 | 0.36 |

Table S7: Supercapacitive performance comparison of the prepared samples with literature.

| Material | $C_{sp}$ | Voltage | ASC/SSC | $E_d$ | Pd | Stability, Reference |
|----------|----------|---------|---------|-------|----|----------------------|
|----------|----------|---------|---------|-------|----|----------------------|

|                                                                               | (Fg <sup>-1</sup> )             | window<br>(V) |     | (Wh kg <sup>-1</sup> ) | (kW<br>kg <sup>-1</sup> ) | %<br>(cycles)    |    |
|-------------------------------------------------------------------------------|---------------------------------|---------------|-----|------------------------|---------------------------|------------------|----|
| MnCo <sub>2</sub> O <sub>4</sub> -<br>graphite@PPY                            | 2364                            | 0-1.6         | ASC | 25.7                   | 16.1                      | 85.5<br>(10,000) | 16 |
| NiCo <sub>2</sub> O <sub>4</sub> /NF@PPY                                      | 1717 C g <sup>-1</sup>          | 0-1.6         | ASC | 68.9                   | 1.77                      | 89.2<br>(10,000) | 17 |
| MgCo <sub>2</sub> O <sub>4</sub> /PPY                                         | 988<br>(1 A g <sup>-1</sup> )   | 0-1.6         | ASC | 40.0                   | 1.54                      | 84.0<br>(10,000) | 18 |
| NiCo <sub>2</sub> O <sub>4</sub> /CNF@PPY                                     | 910<br>(1 A g <sup>-1</sup> )   | 0-1.5         | ASC | 40.8                   | 0.73                      | 88.0<br>(10,000) | 19 |
| NiCo <sub>2</sub> O <sub>4</sub> /Co <sub>3</sub> S <sub>4</sub> /MnS<br>@PPY | 2557<br>(1 A g <sup>-1</sup> )  | 0-1.6         | ASC | 81.1                   | 0.80                      | 83.6<br>(20,000) | 20 |
| MnNi <sub>2</sub> O <sub>4</sub> /PPY                                         | 304<br>(1 A g <sup>-1</sup> )   | 0-1.6         | ASC | 35.9                   | 0.80                      | --               | 21 |
| CC@NiCo <sub>2</sub> O <sub>4</sub> @PPY                                      | 1687<br>(1 A g <sup>-1</sup> )  | 0-1.5         | ASC | 46.5                   | 0.72                      | 80.0<br>(10,000) | 22 |
| NiCo <sub>2</sub> O <sub>4</sub> @PANI                                        | 561<br>(10 mV s <sup>-1</sup> ) | 0-1.2         | ASC | 6.4                    | 0.28                      | 86.2<br>(3,000)  | 23 |
| CoFe <sub>2</sub> O <sub>4</sub> /PANI/GO                                     | 346.9<br>(1 A g <sup>-1</sup> ) | 0-1.2         | SSC | 69.3                   | 5.98                      | 79.0<br>(5,000)  | 24 |

---

|                                                                  |                                                                        |          |     |                               |      |                   |           |
|------------------------------------------------------------------|------------------------------------------------------------------------|----------|-----|-------------------------------|------|-------------------|-----------|
| NiMoO <sub>4</sub> /rGO/PANI                                     | 1150 C g <sup>-1</sup><br>(1 A g <sup>-1</sup> )                       | 0-1.7    | ASC | 82.43                         | 0.85 | 94.5<br>(10,000)  | 25        |
| CuCo <sub>2</sub> O <sub>4</sub> /GO@PANI                        | 312.7<br>(1 A g <sup>-1</sup> )                                        | 0-1.2    | SSC | 62.5                          | 5.99 | 84.2<br>(5,000)   | 26        |
| Fe-MnCo <sub>2</sub> O <sub>4</sub> @PPY                         | 422.4<br>(2 mA cm <sup>-2</sup> )                                      | 0-1      | SSC | 519.9<br>mWh cm <sup>-2</sup> | --   | 94.7<br>(7,000)   | 27        |
| CoCr <sub>2</sub> O <sub>4</sub> /Ti <sub>3</sub> C <sub>2</sub> | 417                                                                    | -0.2-0.5 | 3-E | 20.89                         | 0.60 | --                | 28        |
| NiCo <sub>2</sub> O <sub>4</sub> /CF@PANI                        | 369 mAh g <sup>-1</sup>                                                | 0-1.5    | ASC | 60.60                         | 2.32 | --                | 29        |
| CoCr <sub>2</sub> O <sub>4</sub> /Co-MOF                         | 596.8 C g <sup>-1</sup><br>(1 A g <sup>-1</sup> )                      | 0-1.6    | ASC | 34.36                         | 0.20 | 96.2<br>(5,000)   | 30        |
| CrCo <sub>2</sub> O <sub>4</sub> /AC/PPY                         | 991.25<br>(5 mV s <sup>-1</sup> ),<br>879.37<br>(4 A g <sup>-1</sup> ) | 0-1.6    | HSC | 97.77                         | 1.6  | 76.75<br>(10,000) | This work |

---

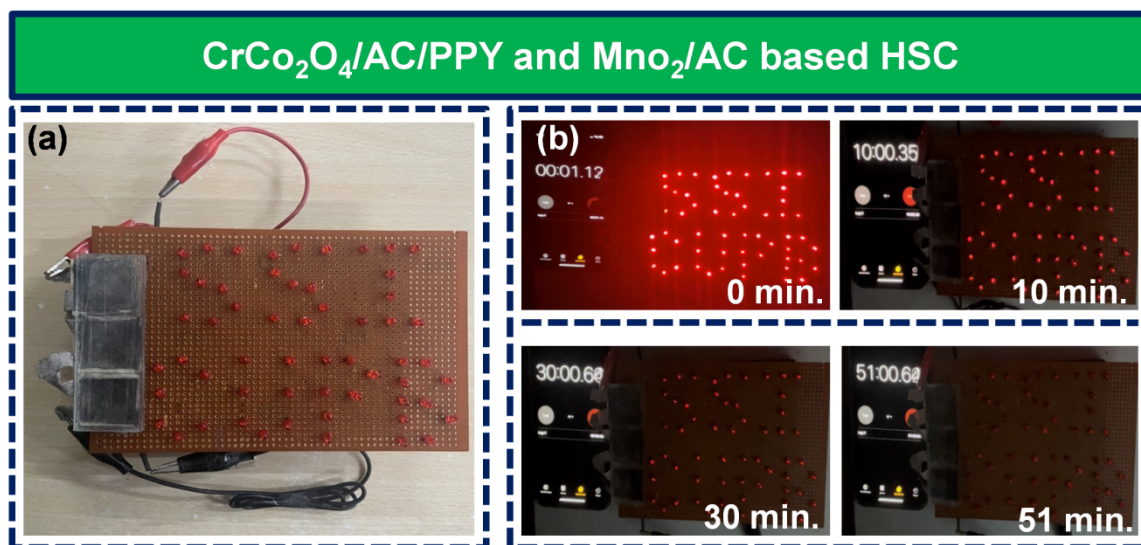

**Fig. S7:** (a) LED-setup for device testing; and (b) Digital images of glowing LED-panel at different times.

## References

1. E. Berei, O. Ștefănescu, C. Muntean, B. Țăranu and M. Ștefănescu, *Journal of Thermal Analysis and Calorimetry*, 2019, **138**, 1863-1870.
2. P. Choudhary, P. Saxena, A. Yadav, A. Sinha, V. Rai, M. Varshney and A. Mishra, *Journal of Superconductivity and Novel Magnetism*, 2019, **32**, 2639-2645.
3. A. Borhade, V. Bobade, D. Tope, J. Agashe and S. Kushare, *Journal of Inorganic and Organometallic Polymers and Materials*, 2021, **31**, 4670-4683.
4. P. Zhang, J. Liu, J. Wu, W. Wang, C. Zhou, S. Guo, S. Li, Y. Yang and L. Chen, *Materials Today Energy*, 2020, **17**, 100451.
5. R. A. Sutar, L. Kumari and M. MV, *Journal of Applied Physics*, 2021, **130**.
6. A. B. D. Nandiyanto, R. Oktiani and R. Ragadhita, *Indonesian Journal of Science and Technology*, 2019, **4**, 97-118.
7. R. Jin, Y. Meng, Y. Ma, H. Li, Y. Sun and G. Chen, *Electrochimica Acta*, 2016, **209**, 163-170.
8. J. Hu, M. Li, F. Lv, M. Yang, P. Tao, Y. Tang, H. Liu and Z. Lu, *Journal of Power Sources*, 2015, **294**, 120-127.
9. Z. Tian, C. Zhu, J. Wang, Z. Xia, Y. Liu and S. Yuan, *Journal of Magnetism and Magnetic Materials*, 2015, **377**, 176-182.
10. M. Kamran, K. Nadeem and M. Mumtaz, *Solid State Sciences*, 2017, **72**, 21-27.
11. H. S. Abdullah, *Int. J. Phys. Sci*, 2012, **7**, 5468-5476.
12. M. Gniadek, S. Malinowska, T. Rapecki, Z. Stojek and M. Donten, *Synthetic metals*, 2014, **187**, 193-200.
13. M. A. Farea, H. Y. Mohammed, P. W. Sayyad, N. N. Ingle, T. Al-Gahouari, M. M. Mahadik, G. A. Bodkhe, S. M. Shirsat and M. D. Shirsat, *Applied Physics A*, 2021, **127**, 681.

14. G. Arteaga, M. Del Valle, M. Antilén, M. Romero, A. Ramos, L. Hernández, M. Arévalo, E. Pastor and G. Louarn, *International Journal of Electrochemical Science*, 2013, **8**, 4120-4130.
15. F. Wu, M. Sun, W. Jiang, K. Zhang, A. Xie, Y. Wang and M. Wang, *Journal of Materials Chemistry C*, 2016, **4**, 82-88.
16. F. Wang, X. Lv, L. Zhang, H. Zhang, Y. Zhu, Z. Hu, Y. Zhang, J. Ji and W. Jiang, *Journal of Power Sources*, 2018, **393**, 169-176.
17. R. BoopathiRaja and M. Parthivarman, *Electrochimica Acta*, 2020, **346**, 136270.
18. S. Sathishkumar, M. Karthik, R. Boopathiraja, M. Parthivarman, S. Nirmaladevi and S. Sathishkumar, *J Mater Sci.: Mater Electron* 2022, **33**, 21600-21614.
19. T. H. Ko, D. Lei, S. Balasubramaniam, M.-K. Seo, Y.-S. Chung, H.-Y. Kim and B.-S. Kim, *Electrochimica Acta*, 2017, **247**, 524-534.
20. L. He, Z. Guo, G. Wang and M. Li, *Journal of Energy Storage*, 2024, **79**, 110130.
21. A. Sathiyar, E. Elaiyappillai, S.-F. Wang, S. Dhineshkumar and P. M. Johnson, *New Journal of Chemistry*, 2024, **48**, 3080-3088.
22. J. Yu, D. Yao, Z. Wu, G. Li, J. Song, H. Shen, X. Yang, W. Lei, F. Wu and Q. Hao, *ACS Applied Energy Materials*, 2021, **4**, 3093-3100.
23. X. Li, H. Xie, Y. Feng, Y. Qu, L. Zhai, H. Sun, X. Liu and C. Hou, *Journal of Applied Polymer Science*, 2023, **140**, e54580.
24. S. Verma, T. Das, V. K. Pandey and B. Verma, *Journal of Molecular Structure*, 2022, **1266**, 133515.
25. H. M. Fahad, R. Ahmad, F. Shaheen, A. A. Ifseisi, M. H. Aziz and Q. Huang, *Electrochimica Acta*, 2024, 143756.
26. S. Verma, V. K. Pandey and B. Verma, *Synthetic Metals*, 2022, **286**, 117036.
27. Z. Chen, X. Zu, L. Chen, Y. Qi, W. Jian, Y. Wu, W. Zhang, X. Lin, G. Yi and Q. Liu, *ACS Applied Energy Materials*, 2022, **5**, 5937-5946.
28. R. Shafique, M. Rani, A. Mahmood, R. A. Alshgari, K. Batool, T. Yaqoob, N. K. Janjua, S. Khan, S. Khan and G. Murtaza, *International Journal of Energy Research*, 2022, **46**, 6689-6701.
29. S. K. Shinde, S. S. Karade, N. T. N. Truong, S. S. Veer, S. F. Shaikh, A. M. Al-Enizi, A. D. Jagadale, H. M. Yadav, M. S. Tamboli and C. Park, *Journal of Energy Storage*, 2024, **78**, 109960.
30. Q. Li, J. Zhou, S. Zhao, Y. Li, C. Chen, K. Tao, R. Liu and L. Han, *ChemElectroChem*, 2020, **7**, 437-444.
